# Supplementary material
Source: PubMed Central journal article supplement (PMC3052288)
Supplement: NIHMS181712-supplement-Supplemental_Figure_1.pdf [file NIHMS181712-supplement-Supplemental_Figure_1.pdf]

# Supplemental Figure 1

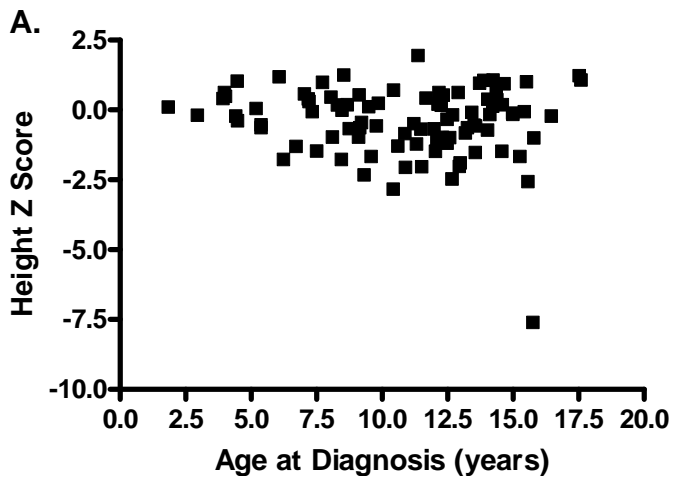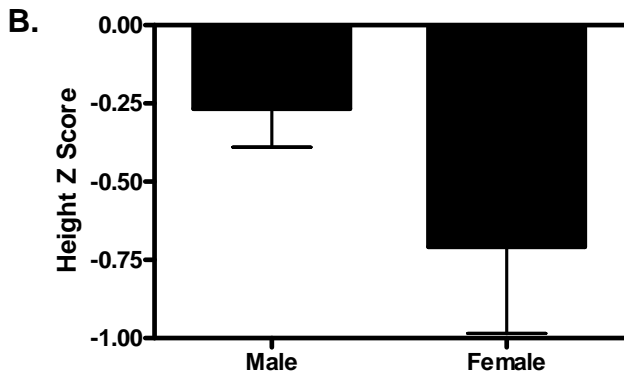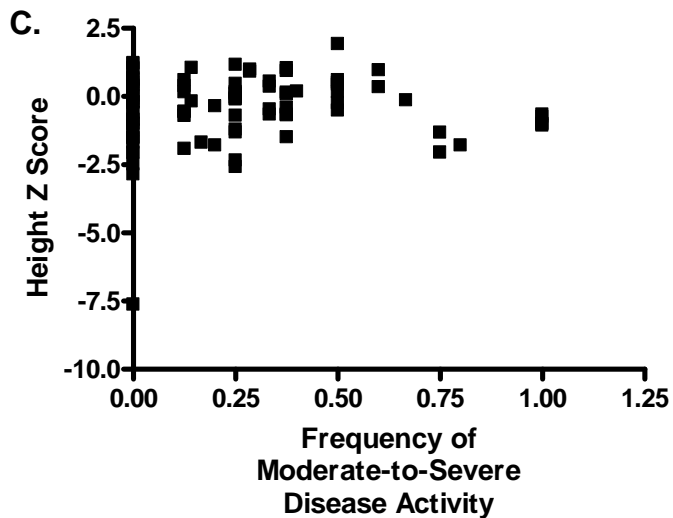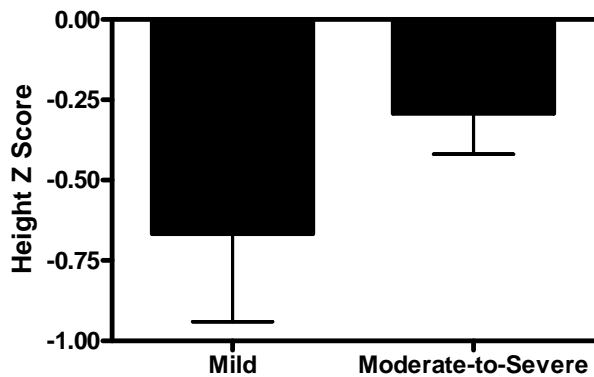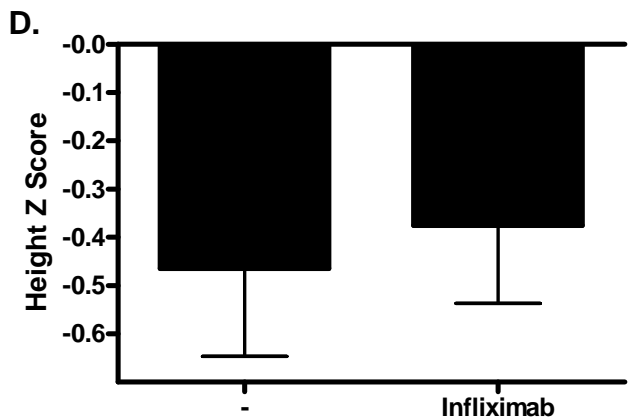

**Supplemental Figure 1. Linear Growth and Age, Gender, Disease Activity, and Biologic Therapy.** (A) Height z score at follow-up is shown relative to age at diagnosis. (B) Height z score at follow-up is shown stratified by gender. (C) Height z score at follow-up is shown relative to the frequency of moderate-to-severe disease activity during follow-up (0.0 to 1.0), and stratified by whether a patient experienced moderate-to-severe disease activity at any point during follow-up (mild versus moderate-to-severe). (D) Height z score at follow-up is shown stratified by exposure to infliximab therapy at any time during follow-up.
